# Supplementary material for: The Chemical Composition and Anti-mycobacterial Activities of Trachyspermum copticum and Pelargonium graveolens Essential Oils
Source: PubMed Central journal article supplement — Recent Pat Anticancer Drug Discov. 2020 Nov 26;15(1):68–74. doi: 10.2174/1574891X14666191028113321 (PMC8493785; doi:10.2174/1574891x14666191028113321), 2020-11-26
Supplement: RAAIDD-15-68_SD1.pdf [file RAAIDD-15-68_SD1.pdf]

## SUPPLEMENTARY MATERIAL

## The Chemical Composition and Anti-mycobacterial Activities of *Trachyspermum copticum* and *Pelargonium graveolens* Essential Oils

Jalil Kardan-Yamchi<sup>1,2</sup>, Mohaddese Mahboubi<sup>3</sup>, Hossein Kazemian<sup>4,5</sup>, Gholamreza Hamzelou<sup>6</sup> and Mohammad M. Feizabadi<sup>2,7,\*</sup>

<sup>1</sup>Division of Microbiology, Department of Pathobiology, School of Public Health, Tehran University of Medical Sciences, Tehran, Iran; <sup>2</sup>Department of Medical Microbiology, School of Medicine, Tehran University of Medical Sciences, Tehran, Iran; <sup>3</sup>Medicinal Plants Research Department, Research and Development, TabibDaru Pharmaceutical Company, Kashan, Iran; <sup>4</sup>Department of Microbiology, Faculty of Medicine, Ilam University of Medical Sciences, Ilam, Iran; <sup>5</sup>Clinical Microbiology Research Center, Ilam University of Medical Sciences, Ilam, Iran; <sup>6</sup>Tehran Regional Reference Laboratory for Tuberculosis, Tehran, Iran; <sup>7</sup>Thoracic Research Center, Imam Khomeini Hospital Complex, Tehran University of Medical Sciences, Tehran, Iran

**Table 1. Chemical composition of *Trachyspermum copticum* essential oil by GC and GC-MS.**

| S. No. | Compounds                            | RI         | (%)         |
|--------|--------------------------------------|------------|-------------|
| 1      | $\alpha$ -phellandrene               | 848        | 0.12        |
| 2      | $\alpha$ -pinene                     | 854        | 0.25        |
| 3      | Camphene                             | 865        | 0.02        |
| 4      | $\beta$ -pinene                      | 896        | 1.0         |
| 5      | $\beta$ -myrcene                     | 912        | 0.3         |
| 6      | <b>p-cymene</b>                      | <b>954</b> | <b>27.3</b> |
| 7      | <b><math>\gamma</math>-terpinene</b> | <b>992</b> | <b>18.6</b> |
| 8      | isopropenyltoluene                   | 1003       | 0.02        |
| 9      | $\alpha$ -terpinolene                | 1004       | 0.04        |
| 10     | cis-sabinene hydrate                 | 1009       | 0.01        |
| 11     | Linalool                             | 1013       | 0.03        |
| 12     | 4-terpineol                          | 1076       | 0.1         |
| 13     | $\alpha$ -terpinol                   | 1135       | 0.1         |

|           |                            |             |             |
|-----------|----------------------------|-------------|-------------|
| 14        | Cuminaldehyde              | 1164        | 0.2         |
| <b>15</b> | <b>Thymol</b>              | <b>1236</b> | <b>50.7</b> |
| 16        | carvacrol                  | 1241        | 0.05        |
| 17        | Verbenone                  | 1248        | 0.1         |
| 18        | $\alpha$ -amorphene        | 1382        | 0.02        |
| 19        | cis-calamenene             | 1384        | 0.02        |
| 20        | $\phi$ -Cadinene           | 1388        | 0.01        |
| 21        | caryophyllene oxide        | 1435        | 0.02        |
| 22        | cis-isoapiole              | 1472        | 0.04        |
| 23        | Methoxymesitylene          | 1791        | 0.02        |
| 24        | 6-Ethyl-3,4-dimethylphenol | 1832        | 0.03        |
| 25        | 2,5-Diethylphenol          | 1892        | 0.04        |
| 26        | Oleic acid, propyl acetate | 1917        | 0.2         |

**Table 2. Chemical composition of Pelargonium graveolens essential oil by GC and GC-MS.**

| S. No. | Compounds              | RI  | (%)  |
|--------|------------------------|-----|------|
| 1      | $\beta$ -phellandrene  | 848 | 0.1  |
| 2      | $\alpha$ -Pinene       | 855 | 0.5  |
| 3      | Camphene               | 865 | 0.01 |
| 4      | $\beta$ -pinene        | 894 | 0.1  |
| 5      | $\beta$ -myrcene       | 912 | 0.13 |
| 6      | $\alpha$ -phellandrene | 923 | 0.5  |
| 7      | $\alpha$ -terpinene    | 933 | 0.1  |
| 8      | o-cymene               | 938 | 0.34 |
| 9      | $\beta$ -phellandrene  | 943 | 0.1  |

|           |                                       |             |             |
|-----------|---------------------------------------|-------------|-------------|
| 10        | Limonene                              | 945         | 0.10        |
| 11        | $\beta$ -ocimene                      | 955         | 0.15        |
| 12        | $\beta$ -ocimene                      | 966         | 0.32        |
| 13        | cis Linalool Oxide                    | 984         | 0.15        |
| 14        | trans Linalool Oxide                  | 997         | 0.1         |
| 15        | $\alpha$ -terpinolene                 | 1018        | 1.41        |
| 16        | rose Oxide                            | 1022        | 1.5         |
| 17        | phenylethyl alcohol                   | 1035        | 2.4         |
| 18        | trans-Menthan-3-one                   | 1057        | 2.9         |
| 19        | p-menthone                            | 1065        | 2.7         |
| <b>20</b> | <b><math>\beta</math>-Citronellol</b> | <b>1174</b> | <b>39.4</b> |
| <b>21</b> | <b>Geraniol</b>                       | <b>1185</b> | <b>23.7</b> |
| <b>22</b> | <b>Nerol</b>                          | <b>1197</b> | <b>11.7</b> |
| 23        | Cyclodecane                           | 1238        | 0.1         |
| 24        | cis-2,6-dimethyl-2,6-octadiene        | 1264        | 0.5         |
| 25        | geranyl acetate                       | 1298        | 1.5         |
| 26        | $\beta$ -bourbonene                   | 1302        | 0.26        |
| 27        | $\beta$ -elemene                      | 1307        | 0.04        |
| 28        | $\alpha$ -Gurjunene                   | 1318        | 0.09        |
| 29        | trans-Caryophyllene                   | 1325        | 0.7         |
| 30        | Citronellyl propionate                | 1339        | 1.3         |
| 31        | $\alpha$ -Caryophyllene               | 1345        | 0.14        |
| 32        | Alloaromadendrene                     | 1349        | 0.07        |
| 33        | Germacrene D                          | 1363        | 0.26        |
| 34        | $\beta$ -Salinene                     | 1366        | 0.03        |
| 35        | Isoledene                             | 1368        | 0.03        |
| 36        | $\beta$ -Patchoulene                  | 1372        | 0.2         |

|    |                                |      |       |
|----|--------------------------------|------|-------|
| 37 | $\alpha$ -Muurolene            | 1375 | 0.04  |
| 38 | cis-Calamenene                 | 1386 | 0.07  |
| 39 | $\phi$ -Cadinene               | 1389 | 0.2   |
| 40 | cis-2,6-Dimethyl-2,6-octadiene | 1392 | 0.12  |
| 41 | Nerolidol                      | 1398 | 0.5   |
| 42 | Farnesol                       | 1433 | 0.62  |
| 43 | Spathulenol                    | 1438 | 0.12  |
| 44 | Neryl acetate                  | 1468 | 0.03  |
| 45 | Cadinene                       | 1485 | 0.741 |
| 46 | Alpha-Amorphene                | 1508 | 0.102 |
| 47 | Citronellyl tiglate            | 1516 | 0.275 |
| 48 | Citronellyl n-butyrate         | 1527 | 2.6   |
| 49 | Geranyl tiglate                | 1546 | 0.26  |
| 50 | Z-Citral                       | 1856 | 0.02  |
| 51 | Squalene                       | 1882 | 0.01  |
| 52 | Oleic acid                     | 1918 | 0.05  |

DISCLAIMER: The above article has been published in Epub (ahead of print) on the basis of the materials provided by the author. The Editorial Department reserves the right to make minor modifications for further improvement of the manuscript.
